# Supplementary material for: Surface energy balance fluxes in a suburban area of Beijing: energy partitioning variability
Source: Copernicus journal article supplement (doi:10.5194/acp-23-13143-2023), 2023-10-18
Supplement: Supplementary file 1 [file acp-23-13143-2023-supplement.pdf]

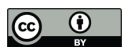

*Supplement of*

## **Surface energy balance fluxes in a suburban area of Beijing: energy partitioning variability**

**Junxia Dou et al.**

*Correspondence to:* Junxia Dou (jxdou@ium.cn)

The copyright of individual parts of the supplement might differ from the article licence.

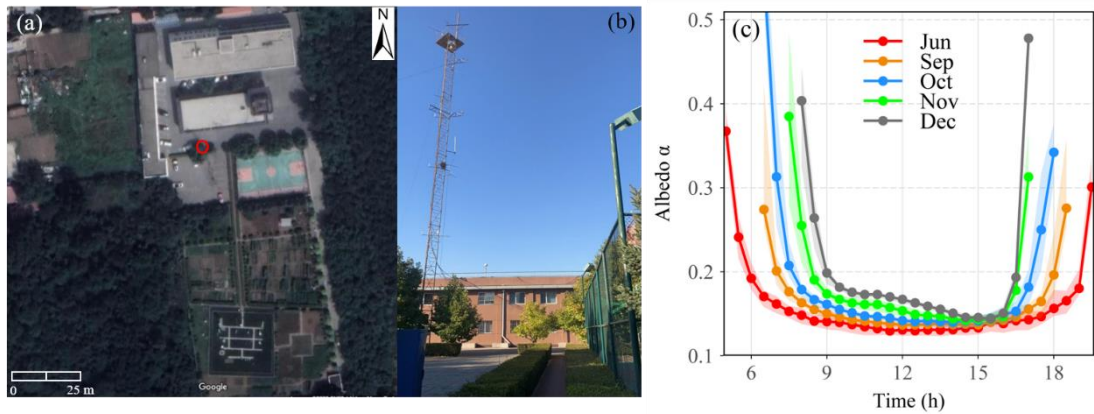

1 **Figure S1:** Study site (a) aerial view around MY flux tower (red circle, tower location) (© Google Earth 2022); (b)  
 2 photo of flux tower and the building to the north of the tower; (c) median diurnal variations (points) and inter-quartile  
 3 range (IQR) (shading) of albedo for June, September, October, November, and December 2013.

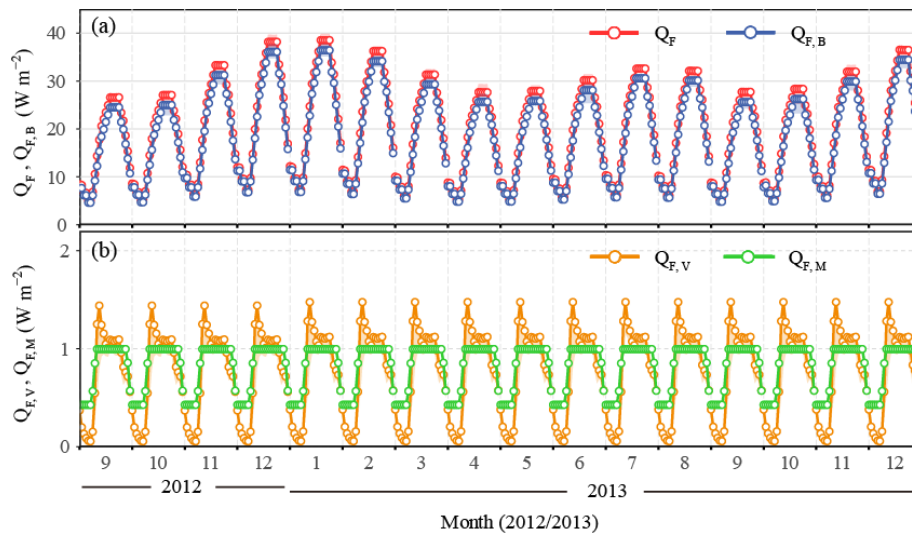

4 **Figure S2:** Monthly median diurnal pattern (points) with inter-quartile range (IQR) (shading) of (a) anthropogenic  
 5 heat flux ( $Q_F$ ) and heat released from buildings ( $Q_{F,B}$ ), (b) heat released from traffic ( $Q_{F,V}$ ) and human metabolism  
 6 ( $Q_{F,M}$ ).

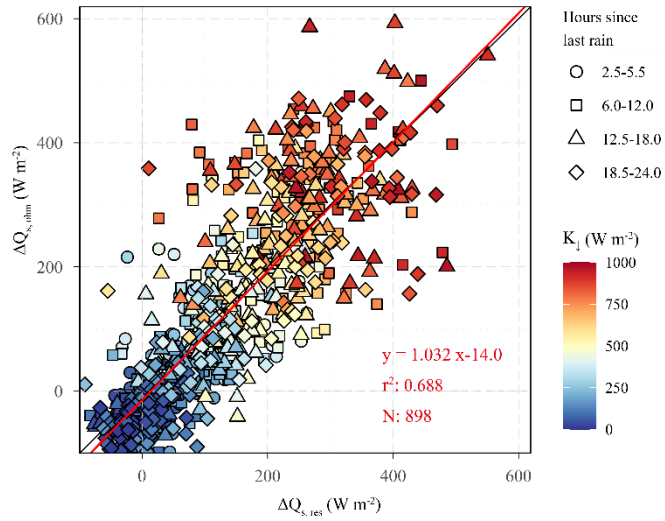

7 **Figure S3:** Daytime 30 min storage heat flux ( $\Delta Q_{s,ohm}$  and  $\Delta Q_{s,res}$ ) at Miyun by number of hours since rainfall  
 8 (shapes) and incoming radiation value (colors) in spring and summer.  $r^2$ : coefficient of determination,  $N$ : evaluation  
 9 data available.

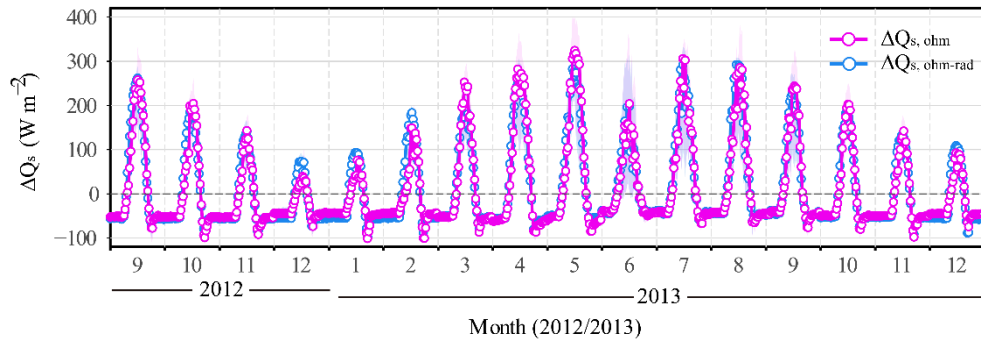

10 **Figure S4:** Monthly median and inter-quartile range (IQR) (shading) diurnal patterns of storage heat flux ( $\Delta Q_{s,ohm}$   
 11 and  $\Delta Q_{s,ohm-rad}$ ) at Miyun (September 2012 to December 2013) (Sect. 3.2).  $\Delta Q_{s,ohm-rad}$ : estimated  $\Delta Q_s$  at MY  
 12 by using land cover fraction of radiation source area.

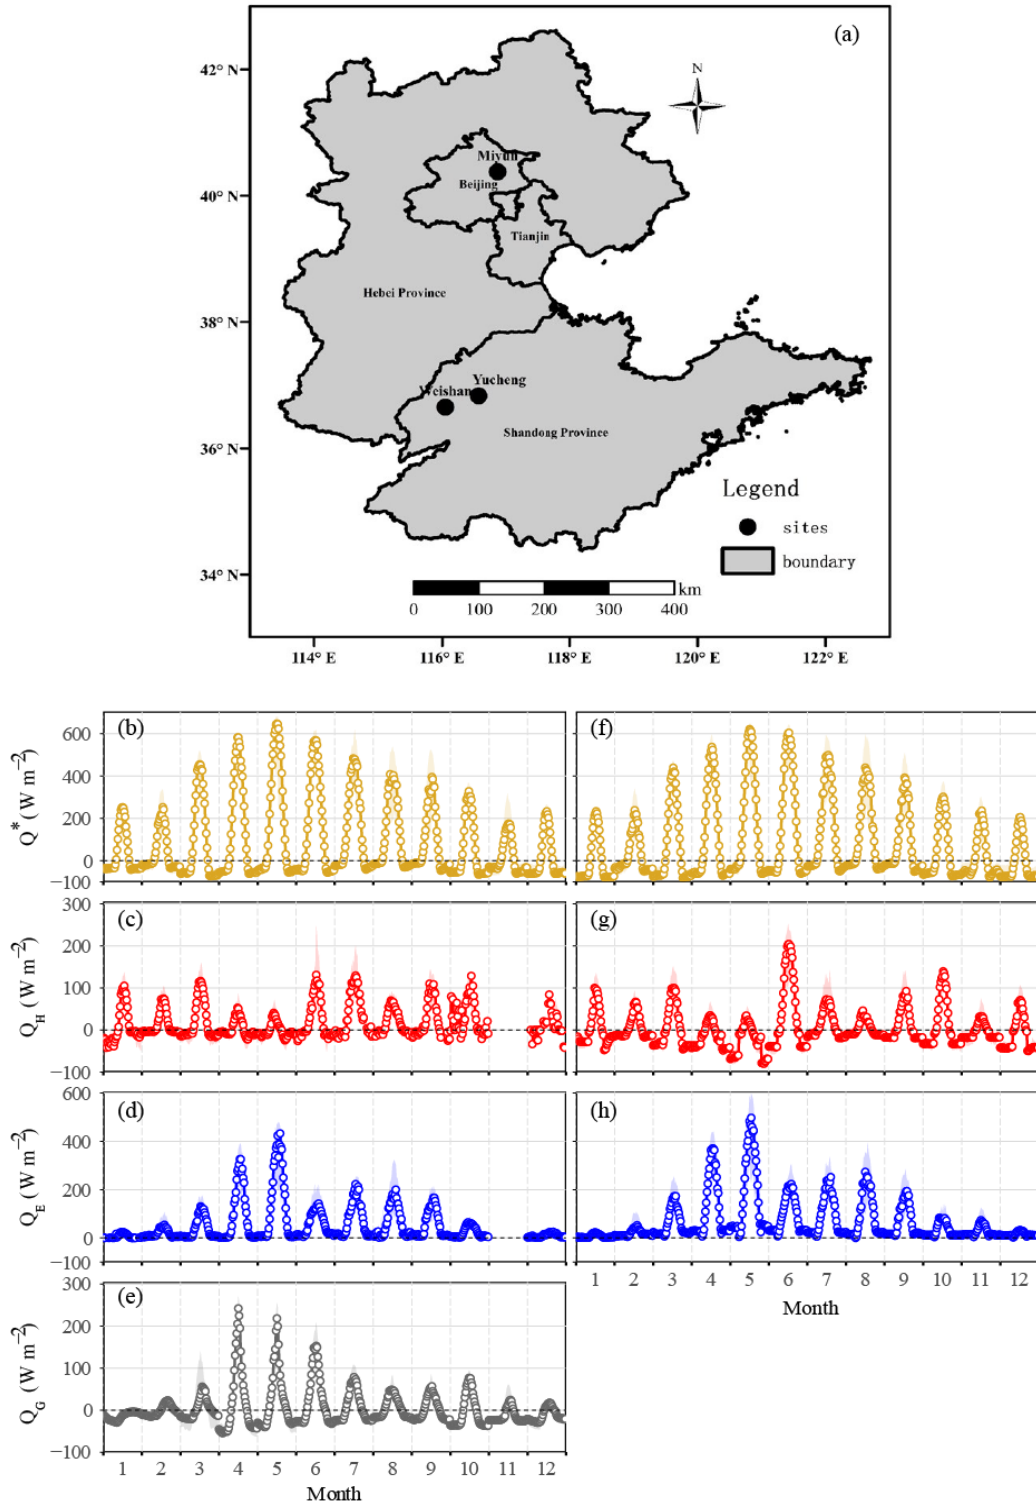

13 **Figure S5:** Location of Weishan and Yucheng stations and Miyun (a) and monthly median and inter-quartile range  
 14 (IQR) (shading) diurnal patterns of net radiation ( $Q^*$ ) (b, f), sensible heat flux ( $Q_H$ ) (c, g), latent heat flux ( $Q_E$ ) (d,  
 15 h), soil heat flux ( $Q_G$ ) (e) at Weishan (b-e) and Yucheng (f-h) in 2009.
